# Supplementary material for: Critical Periods, Critical Time Points and Day-of-the-Week Effects in COVID-19 Surveillance Data: An Example in Middlesex County, Massachusetts, USA
Source: MDPI journal article supplement (doi:10.3390/ijerph19031321), 2022-01-25
Supplement: s1 [file s1]

# Critical periods, critical time points and day-of-the-week effects in COVID-19 surveillance data: an example in Middlesex County, Massachusetts, USA

Ryan B. Simpson <sup>1,a</sup>, Brianna N. Lauren <sup>1,a</sup>, Kees H. Schipper <sup>1</sup>, James C. McCann <sup>1</sup>, Maia C. Tarnas <sup>1</sup>, and Elena N. Naumova <sup>1,\*</sup>

<sup>1</sup> Division of Nutrition Epidemiology and Data Science, Tufts University Friedman School of Nutrition Science and Policy, 150 Harrison Avenue, Boston, MA 02111, USA; [brianna.lauren@tufts.edu](mailto:brianna.lauren@tufts.edu); [ryan.simpson@tufts.edu](mailto:ryan.simpson@tufts.edu); [kschipper0430@comcast.net](mailto:kschipper0430@comcast.net); [james.mccann@tufts.edu](mailto:james.mccann@tufts.edu); [maia.tarnas@gmail.com](mailto:maia.tarnas@gmail.com); [elena.naumova@tufts.edu](mailto:elena.naumova@tufts.edu)

a [ryan.simpson@tufts.edu](mailto:ryan.simpson@tufts.edu) and [brianna.lauren@tufts.edu](mailto:brianna.lauren@tufts.edu) had equal contribution as the first author.

\* Correspondence: [elena.naumova@tufts.edu](mailto:elena.naumova@tufts.edu); Tel.: 617-636-2927

**Supplementary Table S1.** Non-pharmaceutical intervention phases in accordance with Massachusetts state and Middlesex County, Massachusetts COVID-19 health advisories identified from numerous sources [S1-S72]. We provide start dates for each mandate and a brief explanation of the mandate required. We divide mandates by statewide announcements (complementing non-pharmaceutical intervention phases reported in Table 1), Middlesex County testing policies, vaccination-related policies, and county-level university and secondary school closures.

| Start Date                                                    | Description                                                                                                                                                                                                                                                                                                                            |
|---------------------------------------------------------------|----------------------------------------------------------------------------------------------------------------------------------------------------------------------------------------------------------------------------------------------------------------------------------------------------------------------------------------|
| <b>Statewide Non-Pharmaceutical Interventions</b>             |                                                                                                                                                                                                                                                                                                                                        |
| 24 March 2020                                                 | MA stay-at-home (SAH) advisory. Nonessential businesses ordered to close physical workplaces, and restaurants and bars restricted to offering takeout and delivery.                                                                                                                                                                    |
| 06 May 2020                                                   | Face coverings mandated in public places where social distancing is not possible                                                                                                                                                                                                                                                       |
| 18 May 2020                                                   | MA SAH advisory changed to a "safer-at-home" advisory                                                                                                                                                                                                                                                                                  |
| 01 August 2020                                                | MA visitors returning from out of state required to fill out a form and quarantine for two weeks.                                                                                                                                                                                                                                      |
| 07 August 2020                                                | Gov. Baker announced postponement of Phase III-2 reopening, intensifying enforcement of COVID-19 regulation, and reducing number of people allowed at private outdoor events from 100 to 50.                                                                                                                                           |
| 05 October 2020                                               | Gov. Baker announced that 'lower risk' communities would be allowed to move into Phase III-2 of reopening, increasing indoor and outdoor performance venues to 50% capacity, up to 250 people. Fitting rooms could open in retail stores, and gyms, museums, libraries, and driving and flight schools could increase capacity to 50%. |
| 22 October 2020                                               | MADPH closing indoor ice rinks following clusters of COVID-19 at various rinks                                                                                                                                                                                                                                                         |
| 02 November 2020                                              | Gov. Baker announced statewide curfew for businesses and tighter limit on number of people allowed to gather indoors, and stricter face mask requirements. Indoor businesses must close by 9:30 pm and require restaurants to stop providing table services at the same time.                                                          |
| 06 November 2020                                              | Stay-at-home advisory initiated between the hours of 10 pm and 5 am, face coverings required everywhere, 9:30pm closure time for certain businesses                                                                                                                                                                                    |
| 26 December 2020                                              | 25% capacity limit for businesses and activities implemented                                                                                                                                                                                                                                                                           |
| 25 January 2021                                               | "Health clubs, movie theaters, casinos and more" able to stay open past 9:30pm                                                                                                                                                                                                                                                         |
| <b>Middlesex County COVID-19 Testing Policies</b>             |                                                                                                                                                                                                                                                                                                                                        |
| 28 April 2020                                                 | Somerville begins offering free COVID-19 testing to all residents                                                                                                                                                                                                                                                                      |
| 10 July 2020                                                  | Massachusetts begins "Stop the Spread" testing initiative                                                                                                                                                                                                                                                                              |
| <b>State and County COVID-19 Vaccination-Related Policies</b> |                                                                                                                                                                                                                                                                                                                                        |
| 11 January 2021                                               | First responders to begin receiving first doses of the vaccine                                                                                                                                                                                                                                                                         |
| 18 January 2021                                               | Gillette Stadium opens as mass vaccination site                                                                                                                                                                                                                                                                                        |
| 29 January 2021                                               | Fenway Park and Eastfield Mall mass vaccination clinics open                                                                                                                                                                                                                                                                           |
| 01 February 2021                                              | Phase-II of vaccine program making residents older than 75 eligible for the vaccine, opening a mass vaccination site at Fenway Park.                                                                                                                                                                                                   |
| 02 February 2021                                              | Reggie Lewis Center opens as mass vaccination clinic                                                                                                                                                                                                                                                                                   |
| 03 February 2021                                              | Doubletree Hotel mass vaccination clinic opens                                                                                                                                                                                                                                                                                         |
| 22 February 2021                                              | Natick Mall mass vaccination clinic opens                                                                                                                                                                                                                                                                                              |
| 24 February 2021                                              | Old Circuit City mass vaccination clinic opens                                                                                                                                                                                                                                                                                         |
| 11 March 2021                                                 | Teachers and daycare providers eligible to sign up for appointments to receive the vaccine                                                                                                                                                                                                                                             |

|                                     |                                                                                                                      |
|-------------------------------------|----------------------------------------------------------------------------------------------------------------------|
| 22 March 2021                       | Hynes Convention Center mass vaccination site opens and is fully operational                                         |
| <b>County-Level School Closures</b> |                                                                                                                      |
| 07 March 2020                       | University Spring Break periods ranging from start dates of March 7th to March 20th                                  |
| 15 March 2020                       | K-12 schools closed statewide                                                                                        |
| 18 March 2020                       | Childcare programs closed statewide, and emergency childcare programs created                                        |
| 20 April 2020                       | Spring break for public high schools in Middlesex county                                                             |
| 07 May 2020                         | Universities in Middlesex County begin summer break with start dates ranging from May 7th to May 20th                |
| 16 May 2020                         | Summer break begins for public high schools in Middlesex county with start dates ranging from June 15th to June 18th |
| 26 June 2020                        | Childcare facilities authorized for reopening statewide                                                              |
| 10 August 2020                      | Universities in Middlesex County begin term with start dates ranging from Aug 10th to Sep 8th                        |
| 15 August 2020                      | College of the Holy Cross counts 20 positive COVID-19 cases among students after an off-campus party                 |
| 16 August 2020                      | Boston University and Clark University begin moving students into on-campus housing                                  |
| 31 August 2020                      | Term begins for public high schools in Middlesex county with start dates of Aug 31st to Sept 17th                    |
| 04 September 2020                   | Four students dismissed without reimbursement of tuition and housing from Northeastern University                    |
| 22 September 2020                   | Merrimack college quarantines 266 residents of a dorm after 17 cases of COVID-19 were discovered in that dorm        |
| 01 October 2020                     | Students in public schools with highest needs can return to school in person                                         |
| 15 December 2020                    | Universities in Middlesex County begin winter break with start dates ranging from Dec 15th to Dec 23rd               |
| 24 December 2020                    | Winter break for public high schools in Middlesex county                                                             |
| 25 January 2021                     | Universities in Middlesex begin term, with start days from Jan 25th to Mar 1st                                       |
| 15 February 2021                    | Mid-winter break for public high schools in Middlesex county                                                         |

## References

- S1. Coronavirus: Gov. Baker orders schools to remain closed through May 4, ACLU sues ICE to release detainees at risk of COVID-19. *Boston 25 News* [Online]. 25 March 2020. <https://www.boston25news.com/news/coronavirus-live-blog-second-mass-resident-dies-covid-19-525-total-cases-across-state/WUF4Z3XGGVDVBES6E3WMOCJYRQ/> (accessed on 10 June 2021).
- S2. Office of the Governor for the Commonwealth of Massachusetts. Order requiring face coverings in public places where social distancing is not possible: COVID-19 Order No. 31. Available online: <https://www.mass.gov/doc/may-1-2020-masks-and-face-coverings/download> (accessed on 10 June 2021).
- S3. Here's how Massachusetts will reopen under Governor Charlie Baker's plan. *CBS Boston* [Online]. 18 May 2020. <https://boston.cbslocal.com/2020/05/18/massachusetts-reopening-plan-governor-charlie-baker-press-conference-update-businesses-list/> (accessed on 10 June 2021).
- S4. New travel order requires quarantine upon entering Massachusetts, includes \$500 fine. *CBS Boston* [Online]. 24 July 2020. <https://boston.cbslocal.com/2020/07/24/coronavirus-massachusetts-governor-charlie-baker-update-friday-july-24-travel-order-fine-quarantine/> (accessed on 10 June 2021).
- S5. Solis S. Citing COVID-19 clusters, compliance violations, Massachusetts postpones second step of Phase 3 reopening 'indefinitely,' Gov. Charlie Baker says. 07 August 2020. <https://www.masslive.com/coronavirus/2020/08/citing-covid-19-clusters-compliance-violations-massachusetts-postpones-second-step-of-phase-3-reopening-indefinitely-gov-charlie-baker-says.html> (accessed on 10 June 2021).
- S6. Creamer L., Kelly, MB. For lower-risk communities only, Mass. loosens some COVID restrictions around gatherings, recreation. *Wbur*. 29 September 2020. <https://www.wbur.org/news/2020/09/29/massachusetts-coronavirus-towns-phase-update-october> (accessed on 10 June 2021).
- S7. Becker, K.M. Mass. pausing indoor ice hockey for 2 weeks due to increasing COVID-19 cases. *10 Boston* [Online]. 23 October 2020. <https://www.nbcboston.com/news/coronavirus/mass-pausing-indoor-ice-hockey-for-2-weeks-due-to-increasing-covid-19-cases/2216708/> (accessed on 10 June 2021).
- S8. Baker orders curfew for businesses & gatherings, reduces gathering limits, tightens mask mandate. *CBS Boston* [Online]. 02 November 2020. <https://boston.cbslocal.com/2020/11/02/massachusetts-coronavirus-reopening-gov-charlie-baker-covid-19-latest-news/> (accessed on 10 June 2021).
- S9. Office of the Governor for the Commonwealth of Massachusetts. Order temporarily applying further capacity restrictions to statewide COVID-19 safety rules: COVID-19 Order No. 59. Available online: <https://www.mass.gov/doc/covid-19-order-59/download> (accessed on 10 June 2021).
- S10. Staff Reports. Relaxed COVID restrictions take effect in Massachusetts. *10 Boston* [Online]. 25 January 2021. <https://www.nbcboston.com/news/local/relaxed-covid-restrictions-take-effect-in-massachusetts/2286148/> (accessed on 10 June 2021).

- S11. City of Somerville. COVID-19 Update for 4/28/20 and free COVID-19 testing in Somerville. Available online: <https://www.somervillema.gov/news/covid-19-update-42820-and-free-covid-19-testing-somerville> (accessed on 10 June 2021).
- S12. Murphy, M. 'Stop the Spread' initiative will increase testing capacity in eight Mass. towns. *Wbur* [Online]. 08 July 2020. <https://www.wbur.org/news/2020/07/08/stop-the-spread-testing-initiative> (accessed on 10 June 2021).
- S13. First responders to receive shots in Massachusetts. *WYNT.com* [Online]. 05 January 2021. <https://wnyt.com/capital-region-comeback-first-responders-coronavirus-vaccine-massachusetts/5969081/?cat=10114> (accessed on 10 June 2021).
- S14. Carraggi, M. Gillette stadium opening as mass vaccination site: Patch PM. *Patch* [Online]. 12 January 2021. <https://patch.com/massachusetts/boston/gillette-stadium-opening-mass-vaccination-site-patch-pm> (accessed on 10 June 2021).
- S15. Kali, B. COVID mass vaccination site opening at Springfield's Eastfield Mall on Jan. 29, Gov. Charlie Baker says. *Mass LIVE*. [Online]. 25 January 2021. <https://www.masslive.com/coronavirus/2021/01/covid-vaccine-site-opening-at-springfields-eastfield-mall-on-jan-29-gov-charlie-baker-says.html> (accessed on 10 June 2021).
- S16. Fenway Park mass COVID-19 vaccination site now open. *WCVB5*. [Online]. 02 February 2021. <https://www.wcvb.com/article/mass-covid-19-vaccination-site-at-fenway-park-set-for-grand-opening-february-1-2021/35375178> (accessed on 10 June 2021).
- S17. Staff Reports. Massachusetts enters Phase 2 of vaccination plan; injections begin at Fenway. *10 Boston* [Online]. 01 February 2021. <https://www.nbcboston.com/news/local/massachusetts-enters-phase-2-of-vaccination-plan-injections-begin-at-fenway/2290055/> (accessed on 10 June 2021).
- S18. Staff Reports. Cleanup underway after storm slams region; some areas see 2 feet of snow. *10 Boston* [Online]. 02 February 2021. <https://www.nbcboston.com/news/local/watch-live-noreaster-leaves-thousands-without-power-tuesday-morning/2291036/> (accessed on 10 June 2021).
- S19. Germano, B. Mass COVID vaccination site opens at DoubleTree Hotel in Danvers. *CBS Boston* [Online]. 03 February 2021. <https://boston.cbslocal.com/2021/02/03/massachusetts-mass-covid-vaccination-sites-danvers-doubletree-hilton-hotel/> (accessed on 10 June 2021).
- S20. Staff Reports. Natick Mall opens as latest Mass COVID vaccination site. Here's what to know. *10 Boston* [Online]. 22 February 2021. <https://www.nbcboston.com/news/local/a-mass-covid-vaccination-site-has-opened-at-the-natick-mall-heres-what-to-know/2309166/> (accessed on 10 June 2021).
- S21. Cote, J. Former Circuit City in Dartmouth opens as newest super COVID vaccination site in Massachusetts. *Mass LIVE* [Online]. 24 February 2021. <https://www.masslive.com/coronavirus/2021/02/former-circuit-city-in-dartmouth-opens-as-newest-super-covid-vaccination-site-in-massachusetts.html> (accessed on 10 June 2021).
- S22. Markos, M., Saperstone, J., Fortier, M. Baker says teachers in Mass. will be eligible to receive vaccine beginning March 11. *10 Boston* [Online]. <https://www.nbcboston.com/news/local/baker-to-give-covid-vaccine-update-as-cvs-lists-teachers-as-eligible-in-mass/2318130/> (accessed on 10 June 2021).
- S23. New Mass vaccination site at Hynes Convention Center opens. *Wbur* [Online]. 18 March 2021. <https://www.wbur.org/commonhealth/2021/03/18/hynes-boston-coronavirus-vaccine-site> (accessed on 10 June 2021).
- S24. Boston University. Official Academic Calendars. Available online: <https://www.bu.edu/reg/calendars/> (accessed on 10 June 2021).
- S25. Office of the Governor for the Commonwealth of Massachusetts. Order temporarily closing all public and private elementary and secondary schools. Available online: <https://www.mass.gov/doc/march-15-2020-school-closure-order/download> (accessed on 10 June 2021).
- S26. Office of the Governor for the Commonwealth of Massachusetts. Order temporarily closing all child care programs and authorizing the temporary creation and operation of emergency child care programs. Available online: <https://www.mass.gov/doc/march-18-2020-early-education-and-care-order/download> (accessed on 10 June 2021).
- S27. Lowell Public Schools. 2019-2020 school year calendar. Available online: <https://www.lowell.k12.ma.us/cms/lib/MA01907636/Centricity/Domain/4/2019-2020%20School%20Calendar%20with%20Early%20Release%201.pdf> (accessed on 10 June 2021).
- S28. Lowell Public Schools. 2020-2021 school year calendar. Available online: <https://www.lowell.k12.ma.us/cms/lib/MA01907636/Centricity/Domain/30/Approved%20Calendar.pdf> (accessed on 10 June 2021).
- S29. Town of Framingham School Department. 2019-2020 district calendar. Available online: <https://www.framingham.k12.ma.us/cms/lib/MA01907569/Centricity/Domain/81/2018-2019%20SY%20Meetings/02.06.19/Calendar%20English.pdf> (accessed on 10 June 2021).
- S30. Lexington Public Schools. 2019-2020 school calendar. Available online: [https://drive.google.com/file/d/1oJeQRtXWA\\_4gaGeNiZVAb8Qw9C3YEO9y/view](https://drive.google.com/file/d/1oJeQRtXWA_4gaGeNiZVAb8Qw9C3YEO9y/view) (accessed on 10 June 2021).
- S31. Lexington Public Schools. 2020-2021 academic calendar. Available online: <https://drive.google.com/file/d/0B971NdYzXEhucGNodmpiWXNISFVtVXNyM0hpZjNBZzh4aUpR/view> (accessed on 10 June 2021).
- S32. Greater Lowell Technical School. 2019-2020 PN school calendar. Available online: <http://www2.gltech.org/fileBank/CALENDAR%202019-2020.pdf> (accessed on 10 June 2021).

- S33. Greater Lowell Technical School. 2020-2021 school calendar. Available online: [https://www.gltech.org/cms/lib/MA01930064/Centricity/Domain/57/2020-2021%20Calendar\\_REVISED%20COVID\\_FINAL%20Approved%20SC3.pdf](https://www.gltech.org/cms/lib/MA01930064/Centricity/Domain/57/2020-2021%20Calendar_REVISED%20COVID_FINAL%20Approved%20SC3.pdf) (accessed on 10 June 2021).
- S34. Newton public schools. 2019-2020 school calendar. Available online: <https://www.newton.k12.ma.us/cms/lib/MA01907692/Centricity/Domain/4/2019-20%20CALENDAR%20AND%20OBSERVANCES.pdf> (accessed on 10 June 2021).
- S35. Newton public schools. 2020-2021 school calendar. Available online: <https://www.newton.k12.ma.us/cms/lib/MA01907692/Centricity/shared/calendars/2020-21%20CALENDAR.pdf> (accessed on 10 June 2021).
- S36. Cambridge Rindge and Latin School. 2019-2020 school calendar. Available online: [https://crls.cpsd.us/UserFiles/Servers/Server\\_3045299/File/families/YearinViewCalendar1920.pdf](https://crls.cpsd.us/UserFiles/Servers/Server_3045299/File/families/YearinViewCalendar1920.pdf) (accessed on 10 June 2021).
- S37. Cambridge Public Schools. 2020-2021 district calendar. Available online: [https://www.cpsd.us/UserFiles/Servers/Server\\_3042785/File/cps\\_district\\_calendar\\_2020\\_21.pdf](https://www.cpsd.us/UserFiles/Servers/Server_3042785/File/cps_district_calendar_2020_21.pdf) (accessed on 10 June 2021).
- S38. Elizabeth Public Schools. 2020-2021 district calendar. Available online: <https://4.files.edl.io/0b9e/10/16/20/162330-57d404f9-6c67-4047-aed3-ec7e6839138b.pdf> (accessed on 10 June 2021).
- S39. Newton Public Schools. 2019-2020 school calendar. Available online: <https://www.newton.k12.ma.us/cms/lib/MA01907692/Centricity/Domain/4/2019-20%20CALENDAR%20AND%20OBSERVANCES.pdf> (accessed on 10 June 2021).
- S40. Newton Public Schools. 2020-2021 school calendar. Available online: <https://www.newton.k12.ma.us/cms/lib/MA01907692/Centricity/shared/calendars/2020-21%20CALENDAR.pdf> (accessed on 10 June 2021).
- S41. Malden Public Schools. 2019-2020 school calendar. Available online: <https://maldenps.org/wp-content/uploads/2019/07/2019-2020-DISTRICT-Calendar-FINAL.pdf> (accessed on 10 June 2021).
- S42. Malden High School. 2019-2020 master calendar. Available online: <https://maldenps.org/high/student-life/master-calendar/> (accessed on 10 June 2021).
- S43. Malden Public Schools. 2020-2021 school calendar. Available online: <https://maldenps.org/blog/2020/03/03/malden-public-schools-2020-2021-school-calendar/> (accessed on 10 June 2021).
- S44. Acton-Boxborough Regional School District. School calendar, 2020-2021. Available online: [https://www.abschools.org/UserFiles/Servers/Server\\_216027/File/Calendar/ABRSD%20School%20Calendar%202020-2021%20voted%201-9-20.pdf](https://www.abschools.org/UserFiles/Servers/Server_216027/File/Calendar/ABRSD%20School%20Calendar%202020-2021%20voted%201-9-20.pdf) (accessed on 10 June 2021).
- S45. Acton-Boxborough Regional School District. School calendar, 2019-2020. Available online: [https://www.abschools.org/UserFiles/Servers/Server\\_216027/File/Calendar/ABRSD%20School%20Calendar%202019-2020%20VOTED%2012-13-18.pdf](https://www.abschools.org/UserFiles/Servers/Server_216027/File/Calendar/ABRSD%20School%20Calendar%202019-2020%20VOTED%2012-13-18.pdf) (accessed on 10 June 2021).
- S46. Harvard University. Ten year calendar. Available online: <https://registrar.fas.harvard.edu/ten-year-calendar> (accessed on 10 June 2021).
- S47. University of Massachusetts Lowell. Spring 2020 academic calendar (updated). Available online: [https://www.uml.edu/docs/2020\\_spring\\_tcm18-291480.pdf](https://www.uml.edu/docs/2020_spring_tcm18-291480.pdf) (accessed on 10 June 2021).
- S48. University of Massachusetts Lowell. Fall 2020 academic calendar. Available online: [https://www.uml.edu/docs/fall\\_2020\\_tcm18-300466.pdf](https://www.uml.edu/docs/fall_2020_tcm18-300466.pdf) (accessed on 10 June 2021).
- S49. University of Massachusetts Lowell. Fall 2020 academic calendar. Available online: [https://www.uml.edu/docs/2021\\_spring\\_tcm18-300542.pdf](https://www.uml.edu/docs/2021_spring_tcm18-300542.pdf) (accessed on 10 June 2021).
- S50. Middlesex Community College. Academic calendar 2019-2020. Available online: <https://www.middlesex.mass.edu/academiccalendar/Downloads/20192020f.pdf> (accessed on 10 June 2021).
- S51. Middlesex Community College. Academic year 2020-2021. Available online: <https://www.middlesex.mass.edu/academiccalendar/Downloads/ac2021.pdf> (accessed on 10 June 2021).
- S52. Tufts University. Academic calendars. Available online: <https://students.tufts.edu/registrar/what-we-assist/course-registration-and-scheduling/academic-calendars> (accessed on 10 June 2021).
- S53. Massachusetts Institute of Technology. Key dates: Spring 2020. Available online: <https://registrar.mit.edu/sites/default/files/2019-10/Key%20dates%20calendar%20change%20handout.pdf> (accessed on 10 June 2021).
- S54. Massachusetts Institute of Technology. Academic calendar. Available online: <http://catalog.mit.edu/academic-calendar/> (accessed on 10 June 2021).
- S55. Framingham State University. 2019-2020 academic calendar. Available online: <https://www.framingham.edu/academics/registrar/resources/academic-calendars/2019-2020-academic-calendar> (accessed on 10 June 2021).
- S56. Framingham State University. 2020-2021 academic calendar. Available online: <https://www.framingham.edu/academics/registrar/resources/academic-calendars/2020-2021-academic-calendar> (accessed on 10 June 2021).

- S57. Lesley University. Academic calendars. Available online: <https://lesley.edu/students/academic-resources/academic-calendars/2020-2021-academic-calendar> (accessed on 10 June 2021).
- S58. Lesley University. Projected academic calendar dates. Available online: <https://lesley.edu/students/academic-resources/academic-calendars/projected-academic-calendar-dates> (accessed on 10 June 2021).
- S59. Brandeis University. Spring 2020 academic calendar. Available online: <https://www.brandeis.edu/registrar/calendar/spring-2020.html> (accessed on 10 June 2021).
- S60. Brandeis University. Fall 2020 academic calendar. Available online: <https://www.brandeis.edu/registrar/calendar/fall-2020.html> (accessed on 10 June 2021).
- S61. Brandeis University. Spring 2021 academic calendar. Available online: <https://www.brandeis.edu/registrar/calendar/spring-2021.html> (accessed on 10 June 2021).
- S62. University of Massachusetts Amherst. 2019-2020 academic calendar. Available online: [https://d2f5upgbvbkx8pz.cloudfront.net/sites/default/files/inline-files/2019-20-academic-calendar\\_6\\_0.pdf](https://d2f5upgbvbkx8pz.cloudfront.net/sites/default/files/inline-files/2019-20-academic-calendar_6_0.pdf) (accessed on 10 June 2021).
- S63. Bentley University. Academic calendar Fall 2020. Available online: [https://d2f5upgbvbkx8pz.cloudfront.net/sites/default/files/inline-files/Academic%2BCalendar%2BEditions%2BFall%2B2020-v4\\_112420\\_0.pdf](https://d2f5upgbvbkx8pz.cloudfront.net/sites/default/files/inline-files/Academic%2BCalendar%2BEditions%2BFall%2B2020-v4_112420_0.pdf) (accessed on 10 June 2021).
- S64. Bentley University. Academic calendar Spring and Summer 2021. Available online: [https://d2f5upgbvbkx8pz.cloudfront.net/sites/default/files/inline-files/AA.503.21%20Spring%20Summer%202021%20Acad%20Cal%20R2\\_012921.pdf](https://d2f5upgbvbkx8pz.cloudfront.net/sites/default/files/inline-files/AA.503.21%20Spring%20Summer%202021%20Acad%20Cal%20R2_012921.pdf) (accessed on 10 June 2021).
- S65. Cambridge College. Academic catalog 2019-2020. Available online: [https://www.cambridgecollege.edu/sites/default/files/file\\_uploads/2019-2020catalog-finalwithcover-082619.pdf](https://www.cambridgecollege.edu/sites/default/files/file_uploads/2019-2020catalog-finalwithcover-082619.pdf) (accessed on 10 June 2021).
- S66. Cambridge College. Academic calendar. Available online: <https://www.cambridgecollege.edu/academic-calendar> (accessed on 10 June 2021).
- S67. Office of the Governor for the Commonwealth of Massachusetts. Order authorizing the reopening of child care programs and rescinding eight COVID-19 Orders. Available online: <https://www.mass.gov/doc/signed-rescission-and-childcare-reopen-order-41/download> (accessed on 10 June 2021).
- S68. Staff and Wire Reports. More than 20 coronavirus cases tied to college party in Worcester. *10 Boston* [Online]. 30 August 2020. <https://www.nbcboston.com/news/coronavirus/more-than-20-coronavirus-cases-tied-to-college-party-in-worcester/2186558/> (accessed on 10 June 2021).
- S69. Hamm, N. Move-in has begun at Mass. schools with new COVID-19 guidelines. *10 Boston* [Online]. 16 August 2020. <https://www.nbcboston.com/news/local/move-in-begun-massachusetts-schools-new-covid-19-guidelines/2178309/> (accessed on 10 June 2021).
- S70. Becker, K.M., Johnson M., Buja, M. 266 Merrimack College students from same dorm quarantining after multiple positive COVID tests. *10 Boston* [Online]. 22 September 2020. <https://www.nbcboston.com/news/coronavirus/merrimack-college-quarantines-5-students-in-dorm-after-testing-positive-for-covid/2199650/> (accessed on 10 June 2021).
- S71. DeCosta-Klipa, N. Boston Public Schools will begin the year fully remote under new 4-phase plan. *Boston.com* [Online]. 21 August 2020. <https://www.boston.com/news/education/2020/08/21/boston-public-schools-reopening-plan-remote-start> (accessed on 10 June 2021).
- S72. Office of the Governor for the Commonwealth of Massachusetts. Order further extending application of additional capacity restrictions to statewide COVID-19 safety rules and rescinding early closing requirements. Available online: <https://www.mass.gov/doc/covid-19-order-62/download> (accessed on 10 June 2021).
